1 **Transgenic mouse lines expressing the 3xFLAG-dCas9 protein for enChIP**  
2 **analysis**

3  
4 Toshitsugu Fujita, Fusako Kitaura, Asami Oji, Naoki Tanigawa, Miyuki Yuno, Masahito Ikawa,  
5 Ichiro Taniuchi, and Hodaka Fujii\*

6  
7 Toshitsugu Fujita, Hodaka Fujii  
8 Department of Biochemistry and Genome Biology, Hirosaki University Graduate School of  
9 Medicine, Zaifu-cho 5, Hirosaki, Aomori 036-8562, Japan

10  
11 Toshitsugu Fujita, Fusako Kitaura, Naoki Tanigawa, Miyuki Yuno, Hodaka Fujii  
12 Chromatin Biochemistry Research Group, Combined Program on Microbiology and Immunology,  
13 Research Institute for Microbial Diseases, Osaka University, Yamadaoka 3-1, Suita, Osaka  
14 565-0871, Japan

15  
16 Asami Oji, Masahito Ikawa  
17 Genome Information Research Center and Department of Experimental Genome Research,  
18 Research Institute for Microbial Diseases, Osaka University, Yamadaoka 3-1, Suita, Osaka  
19 565-0871, Japan

20  
21 Ichiro Taniuchi  
22 Laboratory for Transcriptional Regulation, RIKEN Center for Integrative Medical Sciences,  
23 1-7-22 Suehiro-cho, Tsurumi-ku, Yokohama City, Kanagawa 230-0045, Japan

24

25 Short title: Transgenic mice expressing 3xFLAG-dCas9

26

27 Keywords: enChIP, dCas9, ChIP, chromatin immunoprecipitation, transgenic mouse

28

29 \*Corresponding author

30 E-mail: hodaka@hirosaki-u.ac.jp

31 Department of Biochemistry and Genome Biology, Hirosaki University Graduate School of

32 Medicine, Zaifu-cho 5, Hirosaki, Aomori, 036-8562 Japan

33 **Abstract**

34  
35 We developed the engineered DNA-binding molecule-mediated chromatin immunoprecipitation  
36 (enChIP) technology to isolate specific genomic regions while retaining their molecular  
37 interactions. In enChIP, the locus of interest is tagged with an engineered DNA-binding molecule,  
38 such as a modified form of the clustered regularly interspaced short palindromic repeats  
39 (CRISPR) system containing a guide RNA (gRNA) and a catalytically inactive form of Cas9  
40 (dCas9). The locus is then affinity-purified to enable identification of associated molecules. In  
41 this study, we generated transgenic mice expressing 3xFLAG-tagged *Streptococcus pyogenes*  
42 dCas9 (3xFLAG-dCas9) and retrovirally transduced gRNA into primary CD4<sup>+</sup> T cells from these  
43 mice for enChIP. Using this approach, we achieved high yields of enChIP at the targeted genomic  
44 region. Our novel transgenic mouse lines provide a valuable tool for enChIP analysis in primary  
45 mouse cells.

## 46 **Introduction**

47 Identification of molecules associated with a genomic region of interest *in vivo* is an essential step  
48 in understanding the regulatory mechanisms underlying that region's functions. To this end, we  
49 previously developed engineered DNA-binding molecule-mediated chromatin  
50 immunoprecipitation (enChIP) technology to isolate genomic regions of interest along with their  
51 interacting molecules (Fujita *et al.* 2013; Fujita & Fujii 2013). In enChIP, the locus of interest is  
52 tagged with engineered DNA-binding molecules, such as transcription activator-like (TAL)  
53 proteins (Bogdanove & Voytas 2011) or a variant of the clustered regularly interspaced short  
54 palindromic repeats (CRISPR) system (Harrison *et al.* 2014; Wright *et al.* 2016) containing a  
55 guide RNA (gRNA) and a catalytically inactive form of Cas9 (dCas9). The tagged locus is then  
56 affinity-purified to enable identification of associated molecules. Locus-tagging can be achieved  
57 in cells by expressing engineered DNA-binding molecules (Fujita *et al.* 2013; Fujita & Fujii 2013,  
58 2014b; Fujita *et al.* 2015; Fujita *et al.* 2016a; Fujita *et al.* 2017b), or *in vitro* using recombinant or  
59 synthetic engineered DNA-binding molecules (Fujita & Fujii 2014a; Fujita *et al.* 2016b; Fujita *et*  
60 *al.* 2017a) Combination of enChIP with mass spectrometry (MS), RNA sequencing, and  
61 next-generation sequencing (NGS) enables identification of proteins (Fujita *et al.* 2013; Fujita &  
62 Fujii 2013, 2014b), RNAs (Fujita *et al.* 2015), and other genomic regions (Fujita *et al.* 2017a;  
63 Fujita *et al.* 2017b) that interact with specific loci of interest in a non-biased manner.

64  
65 To perform locus-tagging in primary cells, it is necessary to express both dCas9 and gRNA by  
66 transduction or other methods. However, the low transduction efficiency of some cell lineages  
67 results in a low percentage of cells expressing both dCas9 and gRNA. To resolve this technical  
68 issue, we generated transgenic (Tg) mouse lines expressing 3xFLAG-tagged *Streptococcus*

69 *pyogenes* dCas9 (3xFLAG-dCas9), either constitutively or inducibly. To facilitate their use in  
70 various experimental contexts, expression of the tagged dCas9 and/or a reporter green fluorescent  
71 protein (GFP) can be flexibly induced or abolished by Cre- or FLPe-mediated site-specific  
72 recombination events that delete expression-modulating cassettes. We anticipate that these novel  
73 Tg mouse lines will serve as a powerful tool for efficient enChIP analysis in primary cells.

## 74 **Results and Discussion**

75

### 76 **Generation of Tg mouse lines expressing 3xFLAG-dCas9**

77 To facilitate enChIP analysis using primary mouse cells, we generated two Tg mouse lines  
78 expressing 3xFLAG-dCas9 (Fig. 1A, B). One line, 3xFLAG-dCas9-IRES-EGFP, harbors  
79 3xFLAG-dCas9 and IRES-EGFP in the *Rosa26* locus (Fig. 1A). In the other line, 3xFLAG-dCas9  
80 and IRES-EGFP are present at the *Rosa26* locus, but expression of 3xFLAG-dCas9 can be  
81 induced by Cre-mediated deletion of the STOP cassette (along with the *neo<sup>r</sup>* gene), and EGFP  
82 expression can be disrupted by FRT-mediated deletion of the IRES-EGFP cassette (Fig. 1B (i)).  
83 3xFLAG-dCas9/CTV (*neo<sup>+</sup>*/ *GFP<sup>+</sup>*) mice were crossed with CAG-Cre mice (Matsumura *et al.*  
84 2004) to delete the STOP cassette and *neo<sup>r</sup>* gene, yielding 3xFLAG-dCas9/CTV (*GFP<sup>+</sup>*) mice  
85 (Fig. 1B (ii)). 3xFLAG-dCas9/CTV (*GFP<sup>+</sup>*) mice can be further crossed with CAG-FLPe mice  
86 (Schaff *et al.* 2001) to delete the IRES-EGFP cassette, yielding 3xFLAG-dCas9/CTV mice (Fig.  
87 1B (iii)). Targeted integration of transgenes was confirmed by PCR (Fig. 1C). All mice were  
88 viable and fertile with normal litter sizes and did not exhibit any morphological abnormalities.  
89 Expression of EGFP was observed throughout the body, including thymocytes and splenocytes  
90 (Fig. 2A), and 3xFLAG-dCas9 was detected in nuclear extracts (NE) of thymocytes (Fig. 2B). In  
91 conventional enChIP using primary cells from mice, it is necessary to transduce both tagged  
92 dCas9 and gRNA. To compare the number of Tg mice required for enChIP with that required for  
93 conventional enChIP, we isolated CD4<sup>+</sup> T cells from a wild-type C57BL/6 mouse and transduced  
94 them with a retroviral plasmid expressing 3xFLAG-dCas9 (3xFLAG-dCas9/MSCV-EGFP). As  
95 shown in Supplementary Figure S1, the transduction efficiency of 3xFLAG-dCas9/MSCV-EGFP  
96 was about 10%. Considering that all cells express 3xFLAG-dCas9 in our Tg mice (Fig. 2A), this

97 means that 10 times more mice are required for conventional enChIP than for enChIP using our  
98 Tg mice. Thus, our Tg mouse lines have the advantage of reducing the number of mice required  
99 for enChIP, as well the time and effort needed to perform enChIP analysis in primary mouse  
100 cells.

101

## 102 **enChIP analysis using primary CD4<sup>+</sup> T cells**

103 Next, we performed enChIP analysis using primary cells from the Tg mice (Fig. 3A). For these  
104 experiments, CD4<sup>+</sup> T cells were purified from 3xFLAG-dCas9-IRES-EGFP mice and  
105 3xFLAG-dCas9/CTV (GFP<sup>+</sup>) mice and activated with anti-CD3 and anti-CD28 Abs. The  
106 activated cells were transduced with a retroviral vector expressing gRNA targeting the *c-myc*  
107 promoter (m-*c-myc* gRNA #1/pSIR-hCD2) or a negative control vector (pSIR-hCD2), and 2 days  
108 later, hCD2<sup>+</sup> cells were isolated and expanded in media containing IL-2. Cells were fixed with  
109 formaldehyde and subjected to enChIP analysis using anti-FLAG Ab. Yields of enChIP were  
110 monitored by real-time PCR. As shown in Figure 3B and C, efficient enrichment of the *c-myc*  
111 promoter region, but not irrelevant loci (*Gapdh*, *Pax5*), was detected in samples expressing  
112 gRNA targeting the *c-myc* locus. By contrast, no enrichment was observed for samples in the  
113 absence of gRNA. The yields of enChIP were comparable between 3xFLAG-dCas9-IRES-EGFP  
114 mice and 3xFLAG-dCas9/CTV (GFP<sup>+</sup>) mice. These results demonstrate that primary cells from  
115 these Tg mice can be used for enChIP analysis.

116

## 117 **Conclusions**

118 We generated Tg mouse lines expressing 3xFLAG-tagged dCas9 and retrovirally transduced  
119 gRNA targeting a genomic locus into primary CD4<sup>+</sup> T cells from these mice. Using this approach,  
120 high yields of enChIP could be achieved. Thus, these Tg mouse lines represent a useful tool for  
121 enChIP analysis in primary mouse cells. The injection of adenovirus-mediated gRNA (Platt *et al.*  
122 2014) into these Tg mice should also enable the isolation of genomic regions of interest from  
123 mouse tissues without the need for primary cell cultures. In addition, the Tg mouse strains  
124 generated in this study could be used for CRISPR interference (CRISPRi) experiments (Qi *et al.*  
125 2013) using primary mouse cells. However, in enChIP analysis, such CRISPRi effects might be  
126 problematic. Therefore, it would be better to choose gRNA target sequences that bind to the  
127 CRISPR complex without interfering with the functions of the target genomic regions.



## 128 **Experimental procedures**

129

### 130 **Plasmids**

131 To construct pCAG1.2-PM, a modified pCAGGS plasmid (Niwa *et al.* 1991) was digested with  
132 *SacI*. Two oligonucleotides, *MluI*-*PmeI* oligo-S (27551) and *MluI*-*PmeI* oligo-A (27552), were  
133 annealed, phosphorylated, and inserted into the digested plasmid, yielding two plasmids,  
134 pCAG1.2-PM (*PmeI*-*MluI*) and pCAG1.2-MP (*MluI*-*PmeI*), distinguished by the orientations of  
135 the oligonucleotides. To construct 3xFLAG-dCas9/pCAG1.2-PM, pCAG1.2-PM was digested  
136 with *EcoRV* and *NotI*. 3xFLAG-dCas9/pMXs-puro (Addgene #51240) was digested with *PacI*,  
137 blunted, and further digested with *NotI*. The vector backbone and the coding sequence of  
138 3xFLAG-dCas9 were purified by agarose gel electrophoresis and ligated. To construct  
139 3xFLAG-dCas9-IG/pCAG1.2-PM, 3xFLAG-dCas9/pCAG1.2-PM and 3xFLAG-dCas9/pMXs-IG  
140 (Addgene #51258) were digested with *NotI* and *SalI*, respectively. After blunting, the plasmids  
141 were further digested with *AscI*. The vector backbone and the coding sequence of  
142 3xFLAG-dCas9 were purified by agarose gel electrophoresis and ligated. To construct  
143 3xFLAG-dCas9-IG/pSKII-ROSA, pSKII-ROSA26arm0.5kb-zeo was digested with *BamHI* and  
144 *SalI*, and 3xFLAG-dCas9-IG/pCAG1.2-PM was digested with *MluI* and *PacI*. After blunting, the  
145 vector backbone and the coding sequence of 3xFLAG-dCas9 were purified by agarose gel  
146 electrophoresis and ligated.

147

148 To construct 3xFLAG-dCas9/CTV, CTV (Addgene #15912) was digested with *AscI*, and  
149 3xFLAG-dCas9/pMXs-puro was digested with *PacI* and *NotI*. After blunting, the vector

150 backbone and the coding sequence of 3xFLAG-dCas9 were purified by agarose gel  
151 electrophoresis and ligated.  
152  
153 To construct 3xFLAG-dCas9/MSCV-EGFP (Addgene #82613), the MSCV-EGFP plasmid  
154 (DeKoter *et al.* 1998) was digested with *Hpa* I and ligated with the coding sequence of  
155 3xFLAG-dCas9, which was derived from 3xFLAG-dCas9/pMXs-puro by digesting with *Pac* I  
156 and *Not* I followed by blunting with DNA Blunting Kit (Takara).

157  
158 To construct a gBlock targeting the mouse *c-myc* promoter, the oligonucleotides mcMYC  
159 promoter 1 sense (27822) and mcMYC promoter 1 antisense (27823) were annealed,  
160 phosphorylated, and inserted into gRNA cloning vector *Bbs*I ver. 1 digested with *Bbs*I. To  
161 construct m-*c-myc* gRNA #1/pSIR, the gBlock was excised with *Xho*I and *Hind*III and inserted  
162 into *Xho*I/*Hind*III-cleaved pSIR (Clontech). To construct a retroviral vector for expression of  
163 gRNA against the mouse *c-myc* promoter (m-*c-myc* gRNA #1/pSIR-hCD2), pSIR-hCD2  
164 (Addgene #51143) and m-*c-myc* gRNA #1/pSIR were digested with *San*DI and *Hind*III. The  
165 vector backbone and insert were purified by agarose gel electrophoresis and ligated.

166

167 Oligonucleotides used for construction of plasmids are shown in Table 1.

168

## 169 **Mice**

170 Embryonic stem (ES) cells (EGR-101) (Fujihara *et al.* 2013) were transfected with linearized  
171 3xFLAG-dCas9-IG/pSKII-ROSA, as described previously (Oji *et al.* 2016). ES cells retaining the  
172 transgene in the *Rosa26* locus were injected into blastocysts (ICR × ICR) to generate chimeric  
173 mice. The chimeric mice were crossed with B6D2F1 mice to generate heterozygous

174 3xFLAG-dCas9-IRES-EGFP mice (strain name:  
175 B6D2-*Gt(ROSA)26Sor<sup>em1(CAG-3XFLAG-dCas9,-EGFP)Osb</sup>*) (RIKEN BioResource Center RBRC09976;  
176 Kumamoto University Center for Animal Resources and Development (CARD): CARD ID  
177 2531).  
178  
179 B6JN/1 ES cells (Moriyama *et al.* 2014), derived from a hybrid between C57BL/6J and  
180 C57BL/6N, were electroporated with 3xFLAG-dCas9/CTV plasmid linearized with *AsiSI*. To  
181 generate chimeric mice, ES cells containing the *neo<sup>r</sup>* gene, transgene, and *GFP* gene in the  
182 *Rosa26* locus were injected into blastocysts (Balb/c × Balb/c) by the animal facility group at  
183 RIKEN IMS. The chimeric mice were crossed with C57BL/6 mice to generate heterozygous  
184 3xFLAG-dCas9/CTV (*neo<sup>+</sup>/GFP<sup>+</sup>*) mice (strain name:  
185 C57BL/6-*Gt(ROSA)26Sor<sup>tm1(CAG-3XFLAG-dCas9,-EGFP)Hfuj</sup>*). The 3xFLAG-dCas9/CTV (*neo<sup>+</sup>/GFP<sup>+</sup>*)  
186 mice were crossed with CAG-Cre mice (Matsumura *et al.* 2004) to generate  
187 3xFLAG-dCas9/CTV (*GFP<sup>+</sup>*) mice (strain name:  
188 C57BL/6-*Gt(ROSA)26Sor<sup>tm1.1(CAG-3XFLAG-dCas9,-EGFP)Hfuj</sup>*). The 3xFLAG-dCas9/CTV (*GFP<sup>+</sup>*) mice  
189 can be crossed with CAG-FLPe mice (Schaff *et al.* 2001) to generate 3xFLAG-dCas9/CTV mice  
190 (strain name: C57BL/6-*Gt(ROSA)26Sor<sup>tm1.2(CAG-3XFLAG-dCas9)Hfuj</sup>*).

191  
192 All animal experiments were approved by the Institutional Animal Care and Use Committee at  
193 Research Institute for Microbial Diseases, Osaka University.

194

195 **Genotyping**

196 For genotyping, genomic DNA was extracted and subjected to PCR with KOD FX (Toyobo).  
197 PCR conditions were as follows: heating at 94°C for 2 min; followed by 38 cycles of 98°C for 10  
198 s, 62°C for 30 s, and 68°C for 4 min. Primers used for genotyping PCR are shown in Table 1.

199

### 200 **Cell staining and flow cytometry**

201 Thymi and spleens were isolated from euthanized mice and used to prepare single cells. For  
202 surface staining, cells were stained for 30 minutes at 4°C with fluorochrome-conjugated  
203 antibodies (Abs): fluorescein isothiocyanate (FITC)-conjugated mouse CD4 (130-102-541,  
204 Miltenyi) and phycoerythrin (PE)-conjugated human CD2 (hCD2) (347597, BD Bioscience).  
205 Flow cytometric analysis was performed on a FACSCalibur (BD Biosciences) and analyzed with  
206 the FlowJo software (TreeStar).

207

### 208 **Immunoblot analysis**

209 NE were prepared with NE-PER Nuclear and Cytoplasmic Extraction Reagents (Thermo Fisher  
210 Scientific). Aliquots of NE (10 µg) were subjected to immunoblot analysis with anti-FLAG M2  
211 Ab (F1804, Sigma-Aldrich), as described previously (Fujita & Fujii 2013).

212

### 213 **Transduction of gRNA and isolation of transduced cells**

214 Transduction of retroviral expression plasmids into primary CD4<sup>+</sup> T cells was performed as  
215 described previously (Naoe *et al.* 2007). Briefly, CD4<sup>+</sup> T cells were purified from spleens using  
216 the Mouse CD4<sup>+</sup> T cell isolation kit (Miltenyi, 130-104-454). Purified CD4<sup>+</sup> T cells were  
217 activated with anti-CD3 Ab (3 µg/ml, 145-2C11, 553057, BD Pharmingen) and anti-CD28 Ab (3  
218 µg/ml, 37.51, 553295, BD Pharmingen). A retroviral expression plasmid was transfected into  
219 Plat-E cells (Morita *et al.* 2000) along with pPAM3 (Miller & Buttimore 1986) using

220 Lipofectamine 3000 (Invitrogen) to produce retroviral particles. Activated CD4<sup>+</sup> T cells were  
221 transduced with the retroviral particles by the spin infection method (Naoe *et al.* 2007). After  
222 culturing for 2 days in RPMI complete media containing mouse IL-2 (20 ng/ml, 402-ML, R & D  
223 Systems), transduced cells were analyzed by flow cytometry. hCD2<sup>+</sup> cells were purified using  
224 human CD2 MicroBeads (130-091-114, Miltenyi) and used for enChIP analysis.

225

### 226 **enChIP real-time PCR**

227 enChIP real-time PCR was performed as described previously (Fujita & Fujii 2013) with some  
228 modifications. Briefly, the CD4<sup>+</sup> T cells (ca.  $1 \times 10^6$ ) were crosslinked with 0.1% formaldehyde  
229 in RPMI complete media at 37°C for 10 min. After quenching and washing with PBS, the  
230 chromatin fraction was extracted and fragmented by sonication. The sonicated chromatin was  
231 used for enChIP using 2 µg of anti-FLAG M2 Ab. DNA was purified using CHIP DNA Clean &  
232 Concentrator (Zymo Research) and subjected to real-time PCR. Primers used in the analysis are  
233 shown in Table 1.

234 **Acknowledgments**

235 We thank S. Muroi for genotyping ES cells, T. Ishikura for injection of ES cells into blastocysts,  
236 and K. Rajewsky and H. Singh for providing plasmids (Addgene plasmid # 15912 and  
237 MSCV-EGFP, respectively).

238

239 **Funding**

240 This work was supported by the Takeda Science Foundation (T.F.), Grant-in-Aid for Scientific  
241 Research (C) (#15K06895) (T.F.), and Grant-in-Aid for Scientific Research (B) (#15H04329) (T.F.,  
242 H.F.), ‘Transcription Cycle’ (#15H01354) (H.F.) from the Ministry of Education, Culture, Sports,  
243 Science and Technology of Japan.

244

245 **Abbreviations:** enChIP, engineered DNA-binding molecule-mediated chromatin  
246 immunoprecipitation; CRISPR, clustered regularly interspaced short palindromic repeats; dCas9,  
247 catalytically inactive form of Cas9; gRNA, guide RNA; GFP, green fluorescent protein; MS,  
248 mass spectrometry; NGS, next-generation sequencing; Tg, transgenic.

249

250 **Conflicts of interests**

251 T.F. and H.F. have patents on enChIP (“Method for isolating specific genomic region using  
252 molecule binding specifically to endogenous DNA sequence”; patent number: Japan 5,954,808;  
253 patent application number: WO2014/125668). T.F. and H.F. are founders of Epigeneron, Inc.

254

255 **Availability of data and materials**

256 All data generated or analyzed during this study are included in the published article. Tg mice  
257 generated in this study can be obtained from RIKEN BioResource Center and Kumamoto  
258 University Center for Animal Resources and Development (CARD).

259

260 **Authors' contributions**

261 H.F. designed and performed experiments (design and construction of transgenes, flow  
262 cytometric analysis, immunoblot analysis, transduction of retroviruses), wrote the manuscript,  
263 and directed and supervised the study. T.F. and M.Y. performed enChIP analyses. N.T.  
264 constructed the retrovirus vector expressing gRNA targeting the *c-myc* locus, and performed  
265 transduction of gRNA retroviruses and enChIP analysis. F.K. and M.Y. maintained the mouse  
266 colony. F.K. screened ES cells and genotyped mice. A.O. and M.I. performed CRISPR-mediated  
267 knock-in of 3xFLAG-dCas9-IRES-EGFP transgenes. I.T. generated ES cells harboring the  
268 3xFLAG-dCas9/CTV transgene, chimeric mice, and knock-in mice.

269 **References**

- 270 Bogdanove, A.J. & Voytas, D.F. (2011) TAL effectors: customizable proteins for DNA targeting.  
271 *Science* **333**, 1843-1846.
- 272 DeKoter, R.P., Walsh, J.C. & Singh, H. (1998) PU.1 regulates both cytokine-dependent  
273 proliferation and differentiation of granulocyte/macrophage progenitors. *EMBO J.* **17**, 4456-4468.
- 274 Fujihara, Y., Kaseda, K., Inoue, N., Ikawa, M. & Okabe, M. (2013) Production of mouse pups  
275 from germline transmission-failed knockout chimeras. *Transgenic Res.* **22**, 195-200.
- 276 Fujita, T., Asano, Y., Ohtsuka, J., Takada, Y., Saito, K., Ohki, R. & Fujii, H. (2013)  
277 Identification of telomere-associated molecules by engineered DNA-binding molecule-mediated  
278 chromatin immunoprecipitation (enChIP). *Sci. Rep.* **3**, 3171.
- 279 Fujita, T. & Fujii, H. (2013) Efficient isolation of specific genomic regions and identification of  
280 associated proteins by engineered DNA-binding molecule-mediated chromatin  
281 immunoprecipitation (enChIP) using CRISPR. *Biochem. Biophys. Res. Commun.* **439**, 132-136.
- 282 Fujita, T. & Fujii, H. (2014a) Efficient isolation of specific genomic regions retaining molecular  
283 interactions by the iChIP system using recombinant exogenous DNA-binding proteins. *BMC Mol.*  
284 *Biol.* **15**, 26.
- 285 Fujita, T. & Fujii, H. (2014b) Identification of proteins interacting with genomic regions of  
286 interest in vivo using engineered DNA-binding molecule-mediated chromatin  
287 immunoprecipitation (enChIP). *Bio-Protoc.* **4**, e1124.
- 288 Fujita, T., Kitaura, F., Yuno, M., Suzuki, Y., Sugano, S. & Fujii, H. (2017a) Locus-specific ChIP  
289 combined with NGS analysis reveals genomic regulatory regions that physically interact with the  
290 Pax5 promoter in a chicken B cell line. *DNA Res.* **24**, 537-548.
- 291 Fujita, T., Yuno, M. & Fujii, H. (2016a) Allele-specific locus binding and genome editing by  
292 CRISPR at the p16INK4a locus. *Sci. Rep.* **6**, 30485.



- 293 Fujita, T., Yuno, M. & Fujii, H. (2016b) Efficient sequence-specific isolation of DNA fragments  
294 and chromatin by in vitro enChIP technology using recombinant CRISPR ribonucleoproteins.  
295 *Genes Cells* **21**, 370-377.
- 296 Fujita, T., Yuno, M., Okuzaki, D., Ohki, R. & Fujii, H. (2015) Identification of non-coding RNAs  
297 associated with telomeres using a combination of enChIP and RNA sequencing. *PLoS One* **10**,  
298 e0123387.
- 299 Fujita, T., Yuno, M., Suzuki, Y., Sugano, S. & Fujii, H. (2017b) Identification of physical  
300 interactions between genomic regions by enChIP-Seq. *Genes Cells* **22**, 506-520.
- 301 Harrison, M.M., Jenkins, B.V., O'Connor-Giles, K.M. & Wildonger, J. (2014) A CRISPR view of  
302 development. *Genes Dev.* **28**, 1859-1872.
- 303 Matsumura, H., Hasuwa, H., Inoue, N., Ikawa, M. & Okabe, M. (2004) Lineage-specific cell  
304 disruption in living mice by Cre-mediated expression of diphtheria toxin A chain. *Biochem.*  
305 *Biophys. Res. Commun.* **321**, 275-279.
- 306 Miller, A.D. & Buttimore, C. (1986) Redesign of retrovirus packaging cell lines to avoid  
307 recombination leading to helper virus production. *Mol Cell Biol.* **6**, 2895-2902.
- 308 Morita, S., Kojima, T. & Kitamura, T. (2000) Plat-E: an efficient and stable system for transient  
309 packaging of retroviruses. *Gene Ther.* **7**, 1063-1066.
- 310 Moriyama, S., Takahashi, N., Green, J., Hori, S., Kubo, M., Cyster, J. & Okada, T. (2014)  
311 Sphingosine-1-phosphate receptor 2 is critical for follicular helper T cell retention in germinal  
312 centers. *J. Exp. Med.* **211**, 1297-1305.
- 313 Naoe, Y., Setoguchi, R., Akiyama, K., Muroi, S., Kuroda, M., Hatam, F., Littman, D. & Taniuchi,  
314 I. (2007) Repression of interleukin-4 in T helper type 1 cells by Runx/Cbf beta binding to the Il4  
315 silencer. *J. Exp. Med.* **204**, 1749-1755.

316 Niwa, H., Yamamura, K. & Miyazaki, J. (1991) Efficient selection for high-expression  
317 transfectants with a novel eukaryotic vector. *Gene* **108**, 193-199.

318 Oji, A., Noda, T., Fujihara, Y., Miyata, H., Kim, Y., Muto, M., Nozawa, K., Matsumura, T.,  
319 Isotani, A. & Ikawa, M. (2016) CRISPR/Cas9 mediated genome editing in ES cells and its  
320 application for chimeric analysis in mice. *Sci. Rep.* **6**, 31666.

321 Platt, R.J., Chen, S., Zhou, Y. *et al.* (2014) CRISPR-Cas9 knockin mice for genome editing and  
322 cancer modeling. *Cell* **159**, 440-455.

323 Qi, L.S., Larson, M.H., Gilbert, L.A., Doudna, J.A., Weissman, J.S., Arkin, A.P. & Lim, W.A.  
324 (2013) Repurposing CRISPR as an RNA-guided platform for sequence-specific control of gene  
325 expression. *Cell* **152**, 1173-1183.

326 Schaft, J., Ashery-Padan, R., van der Hoeven, F., Gruss, P. & Stewart, A. (2001) Efficient FLP  
327 recombination in mouse ES cells and oocytes. *Genesis* **31**, 6-10.

328 Wright, A.V., Nuñez, J.K. & Doudna, J.A. (2016) Biology and Applications of CRISPR Systems:  
329 Harnessing Nature's Toolbox for Genome Engineering. *Cell* **164**, 29-44.

330

331 **Figure legends**

332

333 **Fig. 1.** Generation of Tg mouse lines expressing 3xFLAG-dCas9. (A) Scheme of the targeted  
334 locus of 3xFLAG-dCas9-IRES-EGFP. (B) Scheme of the targeted loci of (i)  
335 3xFLAG-dCas9/CTV ( $neo^+/GFP^+$ ); (ii) 3xFLAG-dCas9/CTV ( $GFP^+$ ); and (iii)  
336 3xFLAG-dCas9/CTV. (C) Genotyping PCR of Tg mouse lines.

337

338 **Fig. 2.** Expression of 3xFLAG-dCas9. (A) Expression of GFP in thymocytes and splenocytes  
339 from Tg mice. Fluorescence in the FL-1 channel (GFP) is shown for C57BL/6 mice (WT: black)  
340 and Tg mice (Tg: green). Numbers represent mean fluorescence intensities (MFI) in the FL-1  
341 channel. (B) Expression of 3xFLAG-dCas9 in thymocytes from Tg mice. Expression of  
342 3xFLAG-dCas9 was detected by immunoblot analysis with anti-FLAG Ab. Coomassie Brilliant  
343 Blue (CBB) staining is shown as a protein loading control.

344

345 **Fig. 3.** enChIP analysis of  $CD4^+$  T cells from 3xFLAG-dCas9 Tg mice. (A) Scheme of enChIP  
346 analysis using Tg mouse lines. (B) Positions of primer sets used for enChIP real-time PCR. Green  
347 letters: primer positions for c-myc (1); red letters: primer positions for c-myc (2); yellow  
348 highlight: gRNA target site; underline: PAM. (C) Yields of enChIP analysis for the target site.  
349 Error bars represent differences between duplicate analyses. N.D.: not detected. Irrelevant loci  
350 (*Gapdh* and *Pax5*) were analysed as negative control loci.

351 **TABLE**

352

353 **Table 1. Oligodeoxyribonucleotides used in this study**

| Number | Name                              | Sequence (5' → 3')         | Experiments                                                                                                                           |
|--------|-----------------------------------|----------------------------|---------------------------------------------------------------------------------------------------------------------------------------|
| 27551  | <i>MluI</i> - <i>PmeI</i> oligo-S | cacgcgtgtttaacgagct        | Construction of pCAG1.2-PM and pCAG1.2-MP                                                                                             |
| 27552  | <i>MluI</i> - <i>PmeI</i> oligo-A | cgtttaaacacgcgtgagct       | Construction of pCAG1.2-PM and pCAG1.2-MP                                                                                             |
| 27699  | ROSA-5' TF2                       | ctcagagagcctcggctagg       | Genotyping of all Tg mouse lines                                                                                                      |
| 27644  | Cas9-R                            | cagggcgataagattaccaaac     | Genotyping of 3xFLAG-dCas9-IRES-EGFP                                                                                                  |
| 26013  | oIMR0013                          | ctgggtggagaggctattc        | Genotyping of 3xFLAG-dCas9/CTV ( <i>neo</i> <sup>+</sup> / <i>GFP</i> <sup>+</sup> )                                                  |
| 28110  | Cas9-R 27643                      | gtaggctttctgcctcctcact     | Genotyping of 3xFLAG-dCas9/CTV ( <i>neo</i> <sup>+</sup> / <i>GFP</i> <sup>+</sup> ) and 3xFLAG-dCas9/CTV ( <i>GFP</i> <sup>+</sup> ) |
| 27822  | mcMYC promoter 1 sense            | caccgcgccccgggacgtgcgtgacg | Construction of gRNA targeting <i>c-myc</i> promoter: sense strand                                                                    |
| 27823  | mcMYC promoter 1 antisense        | aaaccgtcacgcacgtccccgggcgc | Construction of gRNA targeting <i>c-myc</i> promoter: antisense strand                                                                |
| 28157  | mcMYC-0.62k-F                     | tatacgtggcagtgagttgctga    | enChIP real-time PCR [ <i>c-myc</i> (1)]                                                                                              |
| 28158  | mcMYC-0.44k-R                     | ctctaaggctggggaaaacagaa    | enChIP real-time PCR [ <i>c-myc</i> (1)]                                                                                              |
| 28222  | mc-myc_-0.1k-F                    | ctgaggctcctcctcctcttc      | enChIP real-time PCR [ <i>c-myc</i> (2)]                                                                                              |
| 28223  | mc-myc_-0.1k-R                    | cccttccccacctctctctattt    | enChIP real-time PCR [ <i>c-myc</i> (2)]                                                                                              |
| 26574  | mGAPDH-prom-F                     | gggttctataataacggactgc     | enChIP real-time PCR ( <i>Gapdh</i> )                                                                                                 |
| 26575  | mGAPDH-prom-R                     | agcatcctagaccgtacagt       | enChIP real-time PCR ( <i>Gapdh</i> )                                                                                                 |
| 28091  | mPax5-ChIP-prom-F                 | gacctatggaggttgcaattgag    | enChIP real-time PCR ( <i>Pax5</i> )                                                                                                  |
| 28092  | mPax5-ChIP-prom-R                 | agcaagtgttttgaaccctgta     | enChIP real-time PCR ( <i>Pax5</i> )                                                                                                  |

354

355

**A**

bioRxiv preprint doi: <https://doi.org/10.1101/221820>; this version posted January 18, 2018. The copyright holder for this preprint (which was not certified by peer review) is the author/funder, who has granted bioRxiv a license to display the preprint in perpetuity. It is made available under aCC-BY 4.0 International license.

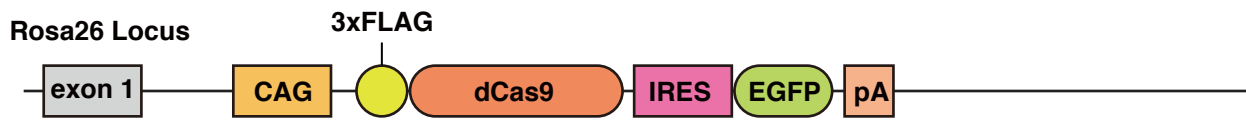

**B**

(i) 3xFLAG-dCas9/CTV (*neo*<sup>+</sup>/*GFP*<sup>+</sup>)

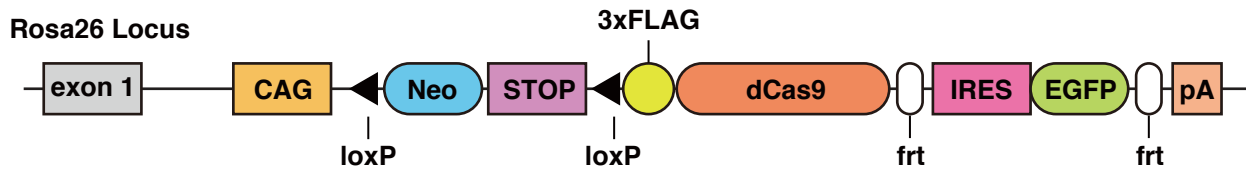

(ii) 3xFLAG-dCas9/CTV (*GFP*<sup>+</sup>)

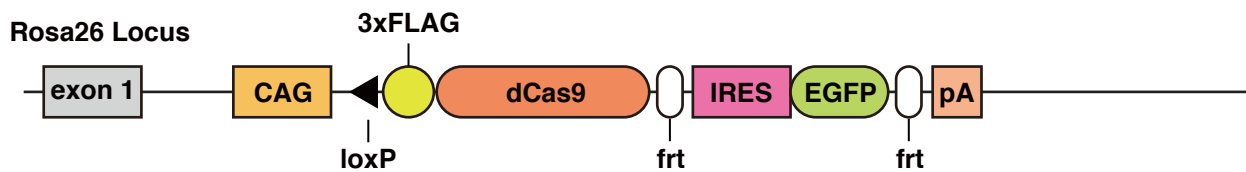

(iii) 3xFLAG-dCas9/CTV

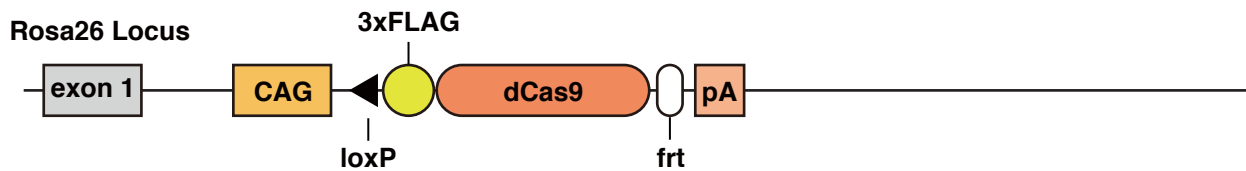

**C**

(a) ROSA-5' TF2 (27699) x Cas9-R (27644)

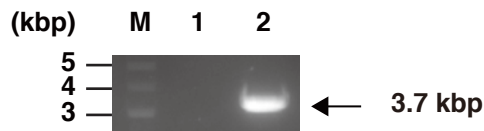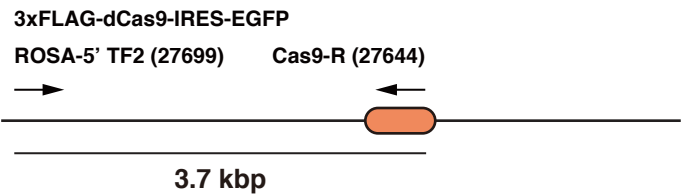

(b) ROSA-5' TF2 (27699) x oIMR0013 (26013)

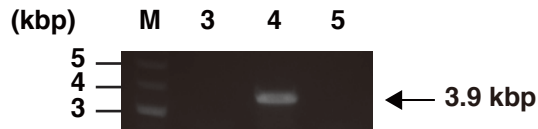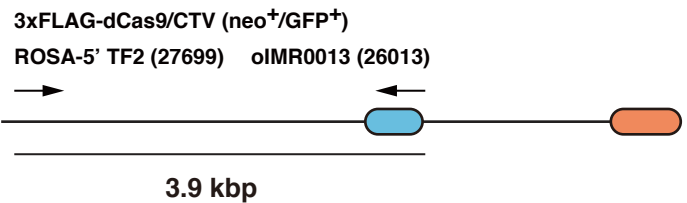

(c) ROSA-5' TF2 (27699) x Cas9-R 27643 (28110)

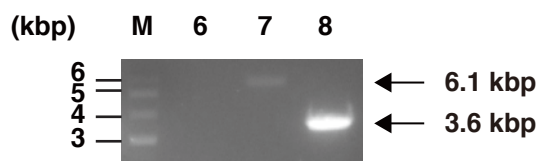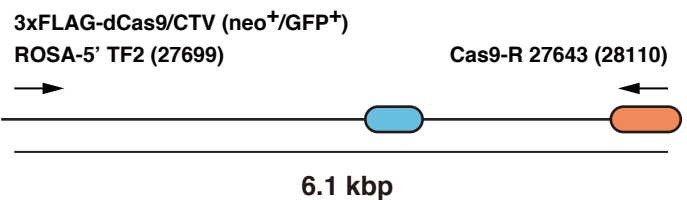

lanes

1, 3, 6: C57BL/6

2: 3xFLAG-dCas9-IRES-EGFP

4, 7: 3xFLAG-dCas9/CTV (*neo*<sup>+</sup>/*GFP*<sup>+</sup>)

5, 8: 3xFLAG-dCas9/CTV (*GFP*<sup>+</sup>)

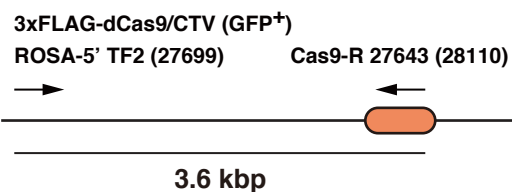

# Figure 2

bioRxiv preprint doi: <https://doi.org/10.1101/221820>; this version posted January 18, 2018. The copyright holder for this preprint (which was not certified by peer review) is the author/funder, who has granted bioRxiv a license to display the preprint in perpetuity. It is made available under aCC-BY 4.0 International license.

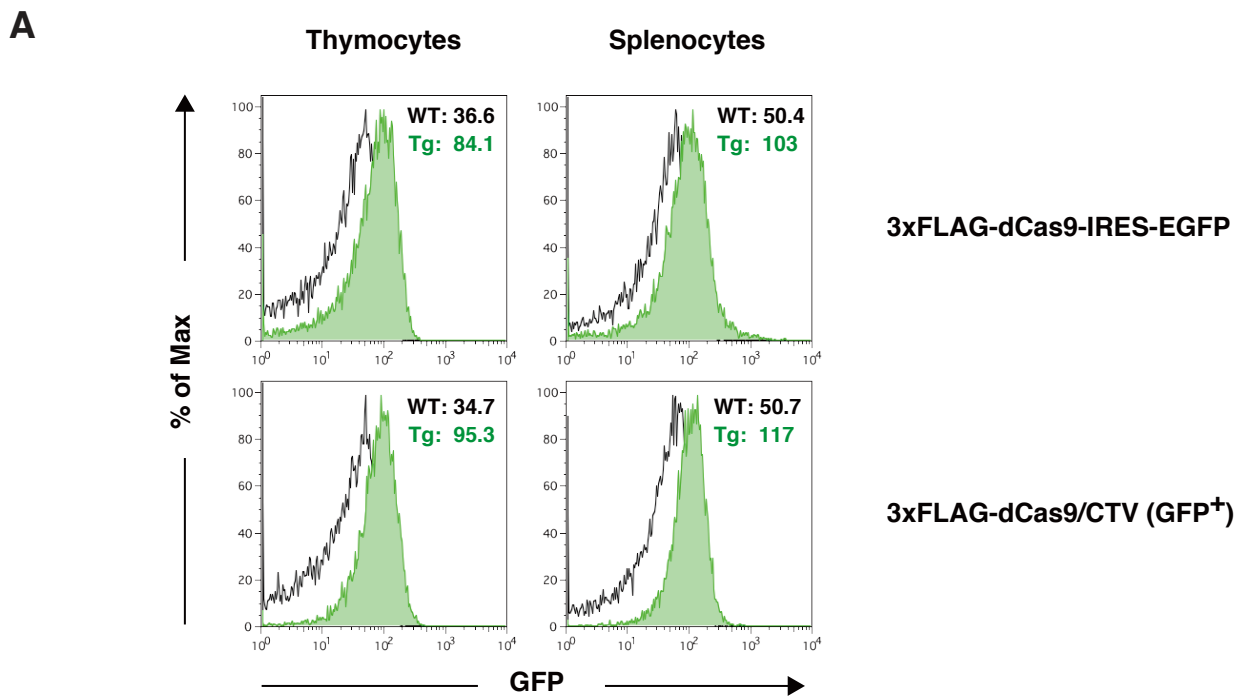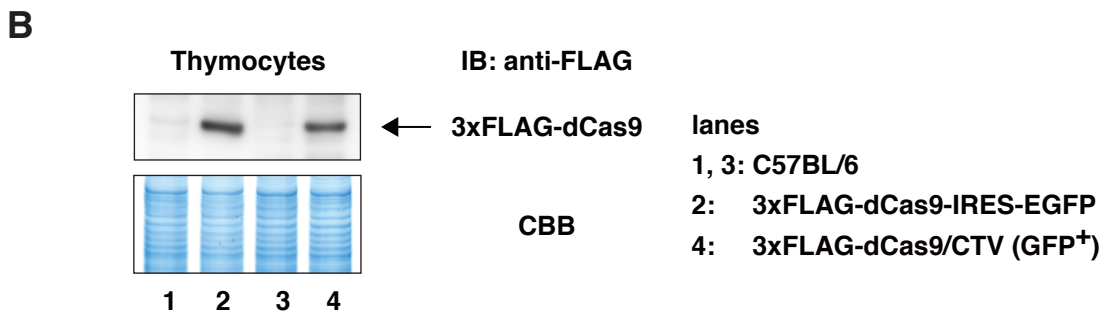

# Figure 3

bioRxiv preprint doi: <https://doi.org/10.1101/221820>; this version posted January 18, 2018. The copyright holder for this preprint (which was not certified by peer review) is the author/funder, who has granted bioRxiv a license to display the preprint in perpetuity. It is made available under aCC-BY 4.0 International license.

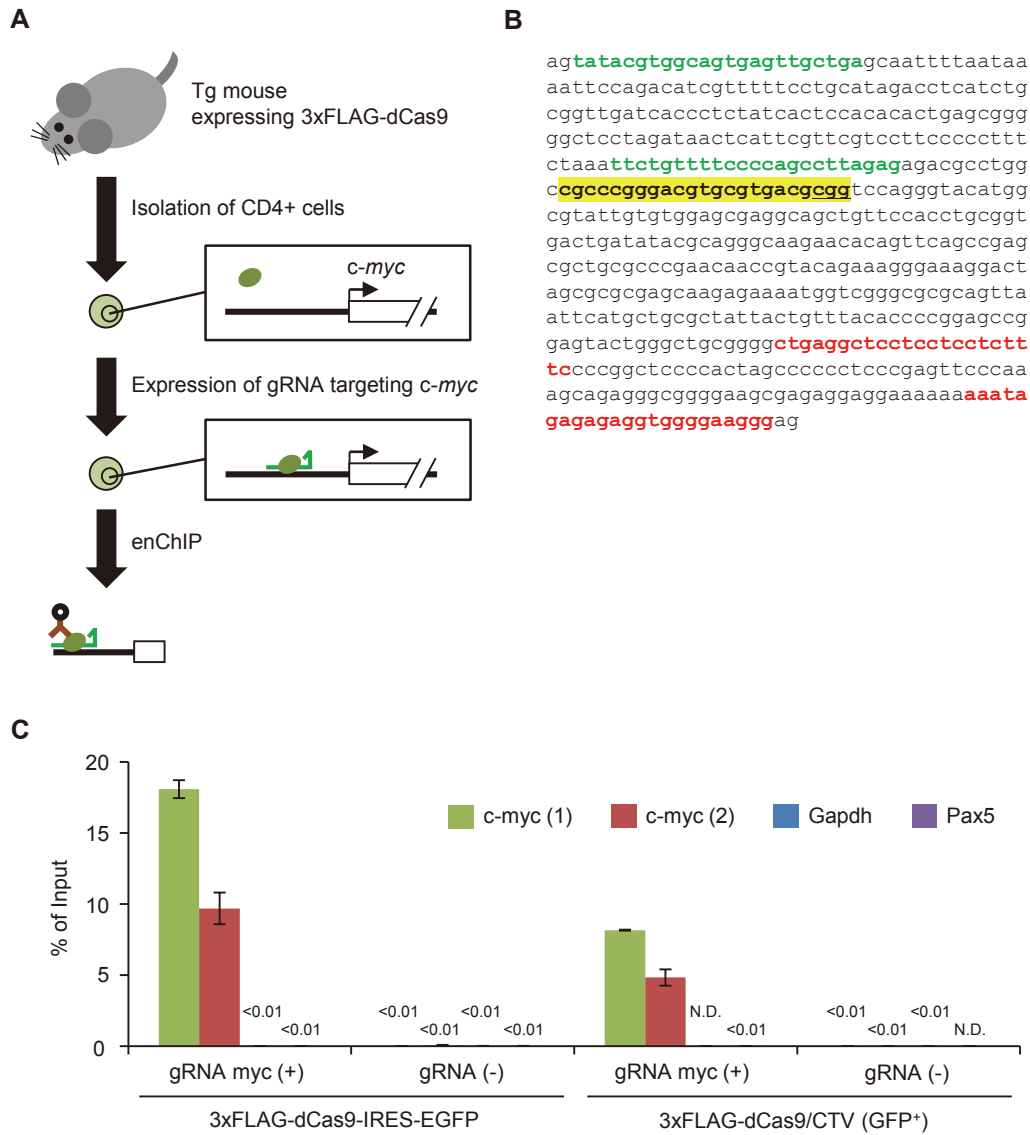

Source: https://www.biorxiv.org/content/10.1101/221820v2.full.pdf
